# Supplementary material
Source: MDPI journal article supplement (https://www.mdpi.com/2221-3759/11/2/23)
Supplement: s1 [file s1]

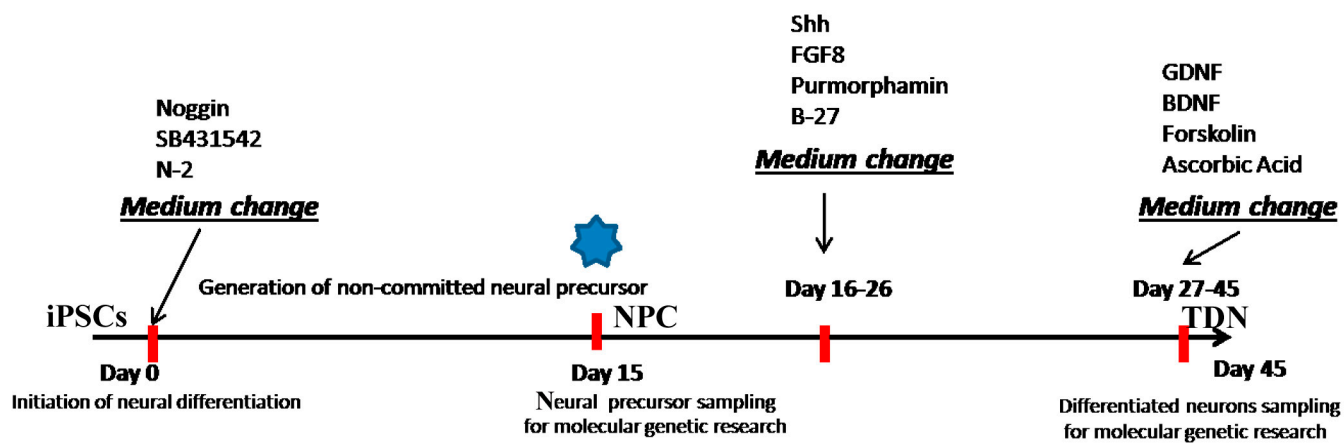

Figure S1. Scheme of experiment.

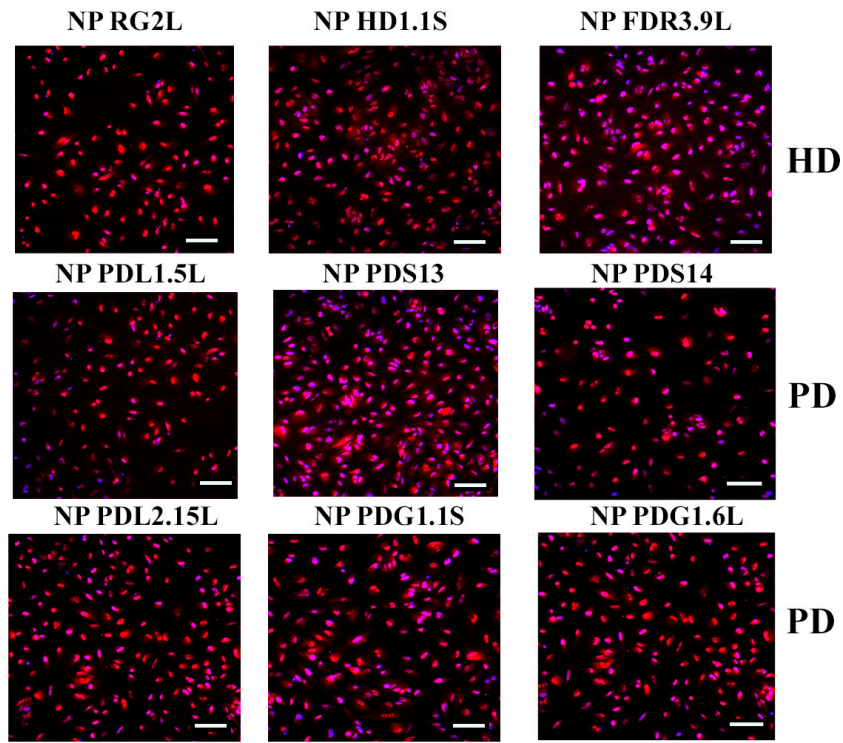

**Figure S2.** Immunocytochemical staining of NPCs with antibodies against Sox1 (red) and nuclear dye DAPI (blue), magnification X 100. NP RG2L (HD1), NP HD 1.1S(HD2), NP RFD 3.9 L(HD3), NP PDL1.5L(PD1), NP PDS13(PD2), NP PDS14(PD3), NP PDL2.15L (PD4), NP PDG1.1S (PD5), NP-PDG 1.6S (PD6).

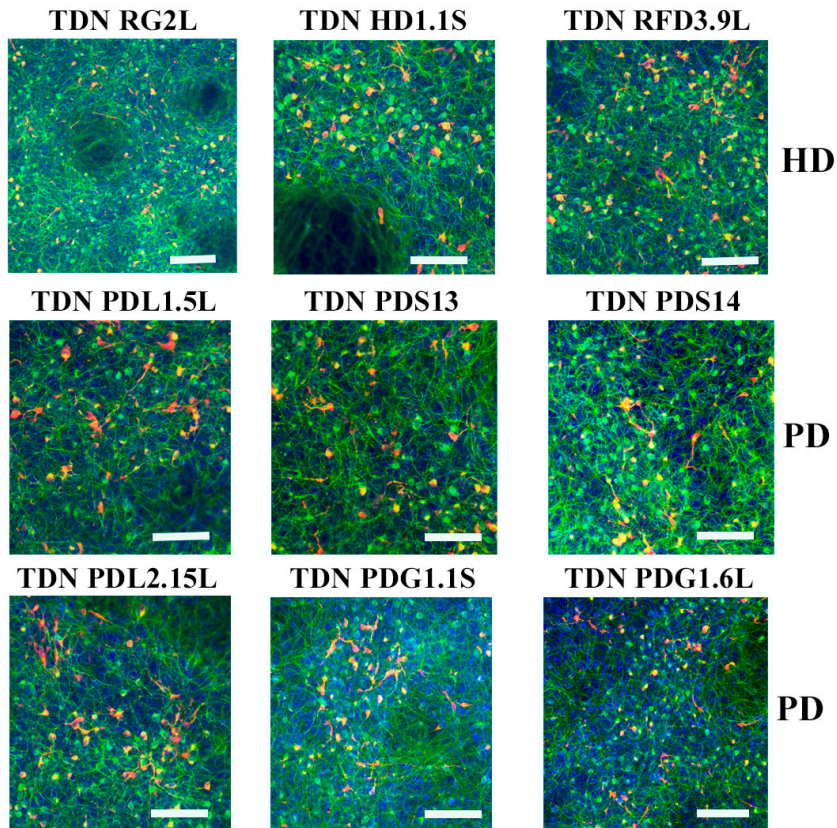

**Figure S3.** Immunocytochemical staining of TDNs with antibodies against  $\beta$  III tub (green), tyrosine hydroxylase (red) and nuclear dye DAPI (blue), magnification X 100. TDN RG2L(HD1), TDN HD 1.1S(HD2), TDN RFD 3.9 L(HD3), TDN PD1.5L(PD1), TDN PDS13(PD2), TD NPDS14(PD3), TDN PDL2.15L (PD4), TDN PDG1.1S (PD5), TDN-PDG 1.6S (PD6).

**Table S1.** The comparison of the expression of the marker genes in NPCs and TDNs from HD and PD patients.

|        | TDN/NPC |        |
|--------|---------|--------|
| Genes  | HD      | PD     |
| NESTIN | 0.88    | 0.82   |
| PAX6   | 1.05    | 0.23   |
| TUBB3  | 4.47**  | 2.49** |
| NEUN   | 8.6**   | 6.47** |
| MAP2   | 1.56**  | 8.95** |
| MSI1   | 1.92**  | 1.94** |
| SNAP25 | 1.56**  | 3.77** |
| SYT1   | 8.39**  | 4.24** |
| PSD95  | 5.12**  | 3.03** |
| RAB5A  | 2.7**   | 1.75** |
| NURR1  | 7.41**  | 7.11** |
| VMAT2  | 1.76**  | 1.43   |

\* p< 0.05 and \*\* p<0.01 TDN vs. NPC according to two factor ANOVA test,

**Table S2.** GSEA results. HD TDNs vs. HD NP. Thresfold  $|\text{Log}_2(\text{FC})| > 2$  and  $\text{Pval} < 0.05$ .

| GO category                                                               | NES  | FDR     | Pval    |
|---------------------------------------------------------------------------|------|---------|---------|
| GO Molecular Function category                                            |      |         |         |
| GO:0030594 Neurotransmitter receptor activity                             | 2.55 | 2.2E-16 | 2.2E-16 |
| GO:0046783 Metal ion transmembrane transporter activity                   | 2.42 | 2.2E-16 | 2.2E-16 |
| GO:0022803 Passive transmembrane transporter activity                     | 2.32 | 2.2E-16 | 2.2E-16 |
| GO:0015077 Monovalent inorganic cation transmembrane transporter activity | 2.30 | 0.00006 | 2.2E-16 |
| GO:0000149 SNARE binding                                                  | 2.09 | 0.0007  | 2.2E-16 |
| GO:0030276 Clathrin binding                                               | 1.98 | 0.0042  | 2.2E-16 |
| GO:0005326 Neurotransmitter transporter activity                          | 1.91 | 0.009   | 0.0012  |
| GO:0005112 Notch binding                                                  | 1.84 | 0.02    | 0.003   |

NES, normalized enrichment score, FDR, false discover rate

**Table S3.** GSEA results. PD2&PD3 TDNs vs. PD2&PD3 NPs. Thresfold  $|\text{Log}_2(\text{FC})| > 2$  and  $\text{Pval} < 0.05$ .

| GO Category                                             | NES  | FDR     | Pval    |
|---------------------------------------------------------|------|---------|---------|
| GO Molecular Function category                          |      |         |         |
| GO:0030594 Neurotransmitter receptor activity           | 2.86 | 2.2E-16 | 2.2E-16 |
| GO:0008066 Glutamate receptor activity                  | 2.69 | 2.2E-16 | 2.2E-16 |
| GO:0042165 Neurotransmitter binding                     | 2.54 | 2.2E-16 | 2.2E-16 |
| GO:0046873 Metal ion transmembrane transporter activity | 2.37 | 0.00004 | 2.2E-16 |
| GO:0022803 Passive transmembrane transporter activity   | 2.32 | 0.00006 | 2.2E-16 |
| GO:0030276 Clathrin binding                             | 2.29 | 0.00008 | 2.2E-16 |
| GO:0005326 Neurotransmitter transporter activity        | 2.1  | 0.0016  | 2.2E-16 |
| GO:0030551 Cyclic nucleotide binding                    | 2.09 | 0.0016  | 0.00044 |

NES, normalized enrichment score, FDR, false discovery rate

**Table S4.** Gene name and ID (ENSEMBL)

| Cluster | Gene Name<br>(coding) | ID (ENSEMBL)    | Gene Name<br>(lncRNA) | ID (ENSEMBL)    |
|---------|-----------------------|-----------------|-----------------------|-----------------|
| HOXA    | HOXA1                 | ENSG00000105991 | HOTAIRM1              | ENSG00000233429 |
|         | HOXA2                 | ENSG00000105996 | HOXA-AS2              | ENSG00000253552 |
|         | HOXA3                 | ENSG00000105997 | HOXA-AS3              | ENSG00000254369 |
|         | HOXA4                 | ENSG00000197576 | AC004080.6            | ENSG00000273433 |
|         | HOXA5                 | ENSG00000106004 | AC004080.5            | ENSG00000272801 |
|         | HOXA6                 | ENSG00000106006 | AC004080.4            | ENSG00000270182 |
|         | HOXA7                 | ENSG00000122592 | HOXA10-AS             | ENSG00000253187 |
|         | HOXA9                 | ENSG00000078399 | HOXA11-AS             | ENSG00000240990 |
|         | HOXA10                | ENSG00000253293 | HOTTIP                | ENSG00000243766 |
|         | HOXA11                | ENSG00000005073 |                       |                 |
|         |                       |                 |                       |                 |
| HOXB    | HOXB1                 | ENSG00000120094 | HOXB-AS1              | ENSG00000230148 |
|         | HOXB2                 | ENSG00000173917 | HOXB-AS2              | ENSG00000239552 |
|         | HOXB3                 | ENSG00000120093 | HOXB-AS3              | ENSG00000233101 |
|         | HOXB4                 | ENSG00000182742 | HOXB-AS4              | ENSG00000242207 |
|         | HOXB5                 | ENSG00000120075 | AC103702.1            | ENSG00000257178 |
|         | HOXB6                 | ENSG00000108511 | AC103702.2            | ENSG00000272763 |
|         | HOXB7                 | ENSG00000260027 | LINC02086             | ENSG00000244649 |
|         | HOXB8                 | ENSG00000120068 |                       |                 |
|         | HOXB9                 | ENSG00000170689 |                       |                 |
|         | HOXB13                | ENSG00000159184 |                       |                 |
|         |                       |                 |                       |                 |
| HOXC    | HOXC4                 | ENSG00000198353 | HOXC-AS1              | ENSG00000250451 |
|         | HOXC5                 | ENSG00000172789 | HOXC-AS2              | ENSG00000250133 |
|         | HOXC6                 | ENSG00000197757 | HOXC-AS3              | ENSG00000251151 |
|         | HOXC8                 | ENSG00000037965 | LINC02381             | ENSG00000250742 |
|         | HOXC9                 | ENSG00000180806 | FLJ12825              | ENSG00000248265 |
|         | HOXC10                | ENSG00000180818 | AC012531.1            | ENSG00000260597 |
|         | HOXC11                | ENSG00000123388 | RP11-834c11.14        | ENSG00000273046 |
|         | HOXC12                | ENSG00000123407 | AC023794.2            | ENSG00000249388 |
|         | HOXC13                | ENSG00000123364 |                       |                 |
|         |                       |                 |                       |                 |
| HOXD    | HOXD1                 | ENSG00000128645 | HOXD-AS1(HAGRL)       | ENSG00000224189 |
|         | HOXD3                 | ENSG00000128652 | HOXD-AS1(HAGRLOS)     | ENSG00000226363 |
|         | HOXD4                 | ENSG00000170166 | HOXD-AS2              | ENSG00000237380 |
|         | HOXD8                 | ENSG00000175879 | AC009336.1            | ENSG00000272729 |
|         | HOXD9                 | ENSG00000249499 |                       |                 |
|         | HOXD10                | ENSG00000128710 |                       |                 |
|         | HOXD11                | ENSG00000128713 |                       |                 |
|         | HOXD12                | ENSG00000170178 |                       |                 |
|         | HOXD13                | ENSG00000128714 |                       |                 |
|         |                       |                 |                       |                 |

**Table S5.** Primers used in this study

| <b>Gene</b>     | <b>Primer sequences (forward/reverse)</b>            |
|-----------------|------------------------------------------------------|
| <i>18s rRNA</i> | F: CCGCTACCACATCCAAGGAA R: GCTGGAATTACCGCGGCT        |
| <i>HOXA3</i>    | F: AGCTCCAGCTCAGGCGAAAG R: TAGCGGTTGAAGTGGAAGTCTT    |
| <i>HOXA5</i>    | F: GCTGCACATAAGTCATGACAAC R: AGGTAACGGTTGAAGTGGAAGT  |
| <i>HOXA7</i>    | F: GGAGTTCCACTTCAACCGCTA R: CAGTCGGACCTTCGTCCTTATG   |
| <i>HOXA9</i>    | F: GGCGCCTTCTCTGAAAACAATG R: GTTGGCTGCTGGGTTTTGGGA   |
| <i>HOXB3</i>    | F: ATGCAGAAAGCCACCTACTACG R: CTGCCAGGGTACGAGGAATAG   |
| <i>HOXB8</i>    | F: TCGCAAATCCAGGAGTTCTACC R: CGGGTCGTAGCCGTAGAAATTG  |
| <i>HOXB9</i>    | F: GAGAGGCCGGATCAAACCAAC R: CTAGCTCCAGCGTCTGGTATTT   |
| <i>HOXC4</i>    | F: TCACGTTAGCACGGTGAACCCC R: CTTCTCCTTCGGGTCAGGTAGC  |
| <i>HOXC5</i>    | F: GCACATGAGCCACGAGACGG R: GCGAGTGAGGTAGCGGTTAAAG    |
| <i>HOXC6</i>    | F: GAATTCGCACAGTGGGGTCGG R: CTGGTACCGCGAGTAGATCTGG   |
| <i>HOXD3</i>    | F: ATGCTTCTAGCTCCTCAGCCAC R: GTCCTCGCAGCTCTCTCCTGC   |
| <i>HOXD8</i>    | F: TGGATGAGACCACAAGCAGCTC R: CTCTAGAGTTTGGAAGCGACTGT |

**Table S6.** GSEA results (threshold  $|\text{Log}_2(\text{FC})| > 2$  and  $\text{Pval} < 0.05$ ).

| NPC (PD2&PD3 vs HD)    |                                                                                      | NES  | FDR     | Pval    |
|------------------------|--------------------------------------------------------------------------------------|------|---------|---------|
| GO: Molecular Function |                                                                                      |      |         |         |
| GO:0035326             | Enhancer binding                                                                     | 2.30 | 2.2E-16 | 2.2E-16 |
|                        | DNA-binding transcription activator activity,                                        |      |         |         |
| GO:0001228             | RNA polymerase II-specific                                                           | 2.09 | 0.00013 | 2.2E-16 |
| GO:0033613             | Activating transcription factor binding                                              | 1.99 | 0.001   | 2.2E-16 |
| GO: Biological Process |                                                                                      |      |         |         |
| GO:0048706             | Embryonic skeletal system development                                                | 2.66 | 2.2E-16 | 2.2E-16 |
| GO:0021510             | Spinal cord development                                                              | 2.41 | 2.2E-16 | 2.2E-16 |
| GO:0048705             | Skeletal system morphogenesis                                                        | 2.37 | 2.2E-16 | 2.2E-16 |
| GO:0007389             | Pattern specification process                                                        | 2.30 | 2.2E-16 | 2.2E-16 |
| GO:0048568             | Embryonic organ development                                                          | 2.22 | 2.2E-16 | 2.2E-16 |
| GO:0048736             | Appendage development                                                                | 2.12 | 0.00005 | 2.2E-16 |
| GO:0021675             | Nerve development                                                                    | 2.09 | 0.00009 | 2.2E-16 |
| GO:0035270             | Endocrine system development                                                         | 2.09 | 0.00008 | 2.2E-16 |
| GO:0045165             | Cell fate commitment                                                                 | 2.01 | 0.0006  | 2.2E-16 |
| GO:0031016             | Pancreas development                                                                 | 1.98 | 0.0013  | 2.2E-16 |
| Reactome               |                                                                                      |      |         |         |
| R-HSA-5617472          | Activation of anterior HOX genes in hindbrain development during early embryogenesis | 2.32 | 2.2E-16 | 2.2E-16 |
| R-HAS-5619507          | Activation of HOX genes during differentiation                                       | 2.32 | 2.2E-16 | 2.2E-16 |
| TDN (PD2&PD3 vs HD)    |                                                                                      |      |         |         |
| GO: Molecular function |                                                                                      |      |         |         |
| GO:0035326             | Enhancer binding                                                                     | 2.61 | 2.2E-16 | 2.2E-16 |
|                        | DNA-binding transcription activator activity,                                        |      |         |         |
| GO:0001228             | RNA polymerase II-specific                                                           | 2.53 | 2.2E-16 | 2.2E-16 |
| GO: Biological Process |                                                                                      |      |         |         |
| GO:0048706             | Embryonic skeletal system development                                                | 2.86 | 2.2E-16 | 2.2E-16 |
| GO:0007389             | Pattern specification process                                                        | 2.68 | 2.2E-16 | 2.2E-16 |
| GO:0048705             | Skeletal system morphogenesis                                                        | 2.59 | 2.2E-16 | 2.2E-16 |
| GO:0021675             | Nerve development                                                                    | 2.32 | 0.0005  | 2.2E-16 |
| GO:0048568             | Embryonic organ development                                                          | 2.12 | 0.006   | 2.2E-16 |
| Wikipathway            |                                                                                      |      |         |         |
| WP2855                 | Dopaminergic Neurogenesis                                                            | 1.98 | 0.03    | 0.0007  |

NES, Normalized enrichment score, FDR, False discovery rate

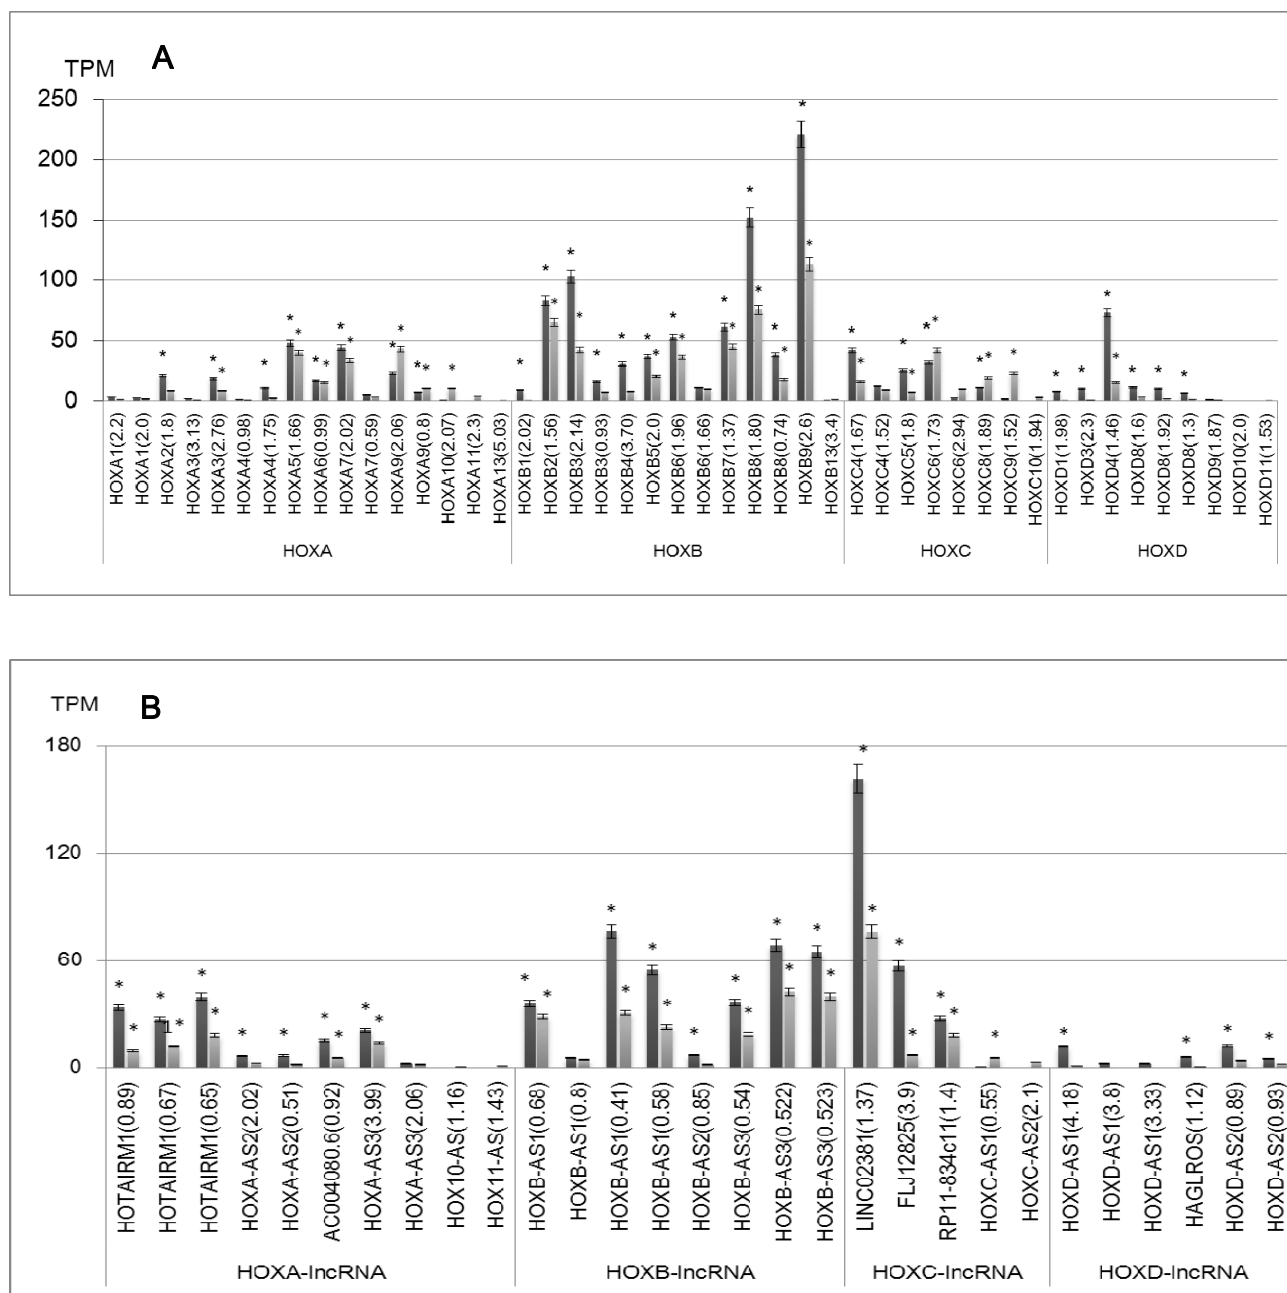

**Figure S4.** Transcription profiling of protein-coding (A) and lncRNA (B) genes of *HOX* clusters in NPCs from PD2 patient (black) and PD3 patient (grey) expressed as the number of TPM for transcript variants. The order of the genes corresponds to their location in the cluster in the 3' to 5' direction. The length of mRNA variants in kilobases is indicated in parentheses. Statistical significance is estimated by Manna-Whitney U-test (\*  $P < 0.05$  for PD cells vs. HD cells).

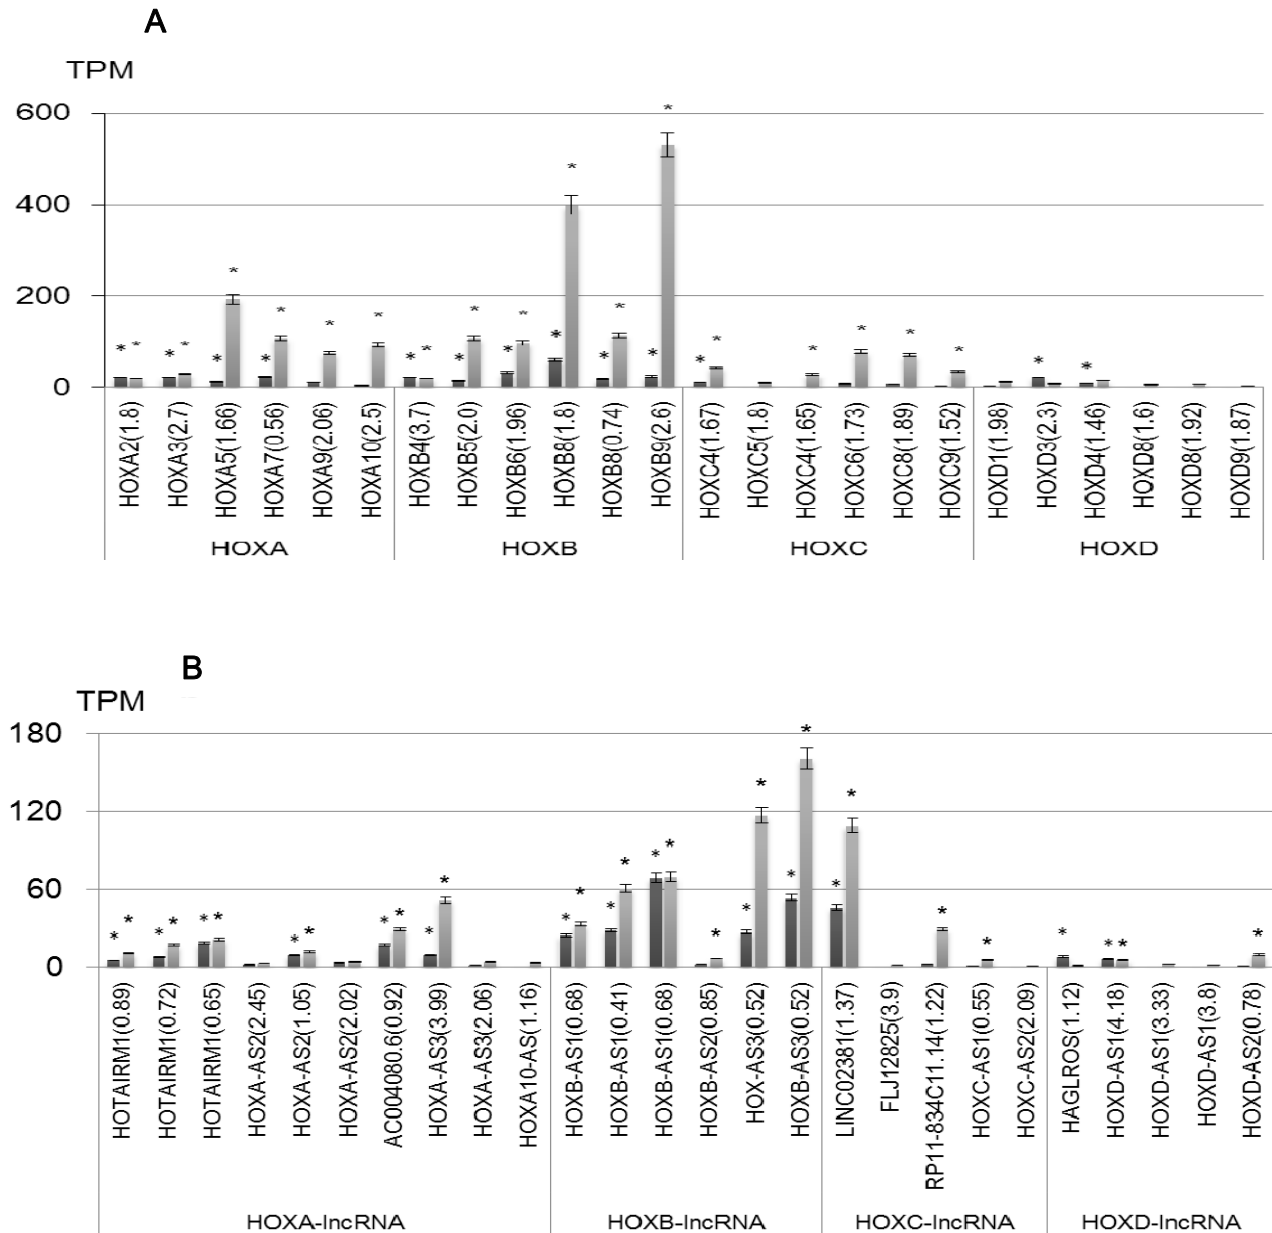

**Figure S5.** Transcription profiling of protein-coding (A) and lncRNA (B) genes of *HOX* clusters in iPSC-derived TDN from PD2 (black) and PD3 (grey) patient, which expressed as the number of TPM for transcript variants. The order of the genes corresponds to their location in the 3' to 5' direction in the cluster. The length of mRNA in kilobases is indicated in parentheses. Statistical significance is estimated by Manna-Whitney U-test (\*  $P < 0.05$  for PD cells vs. HD cells).

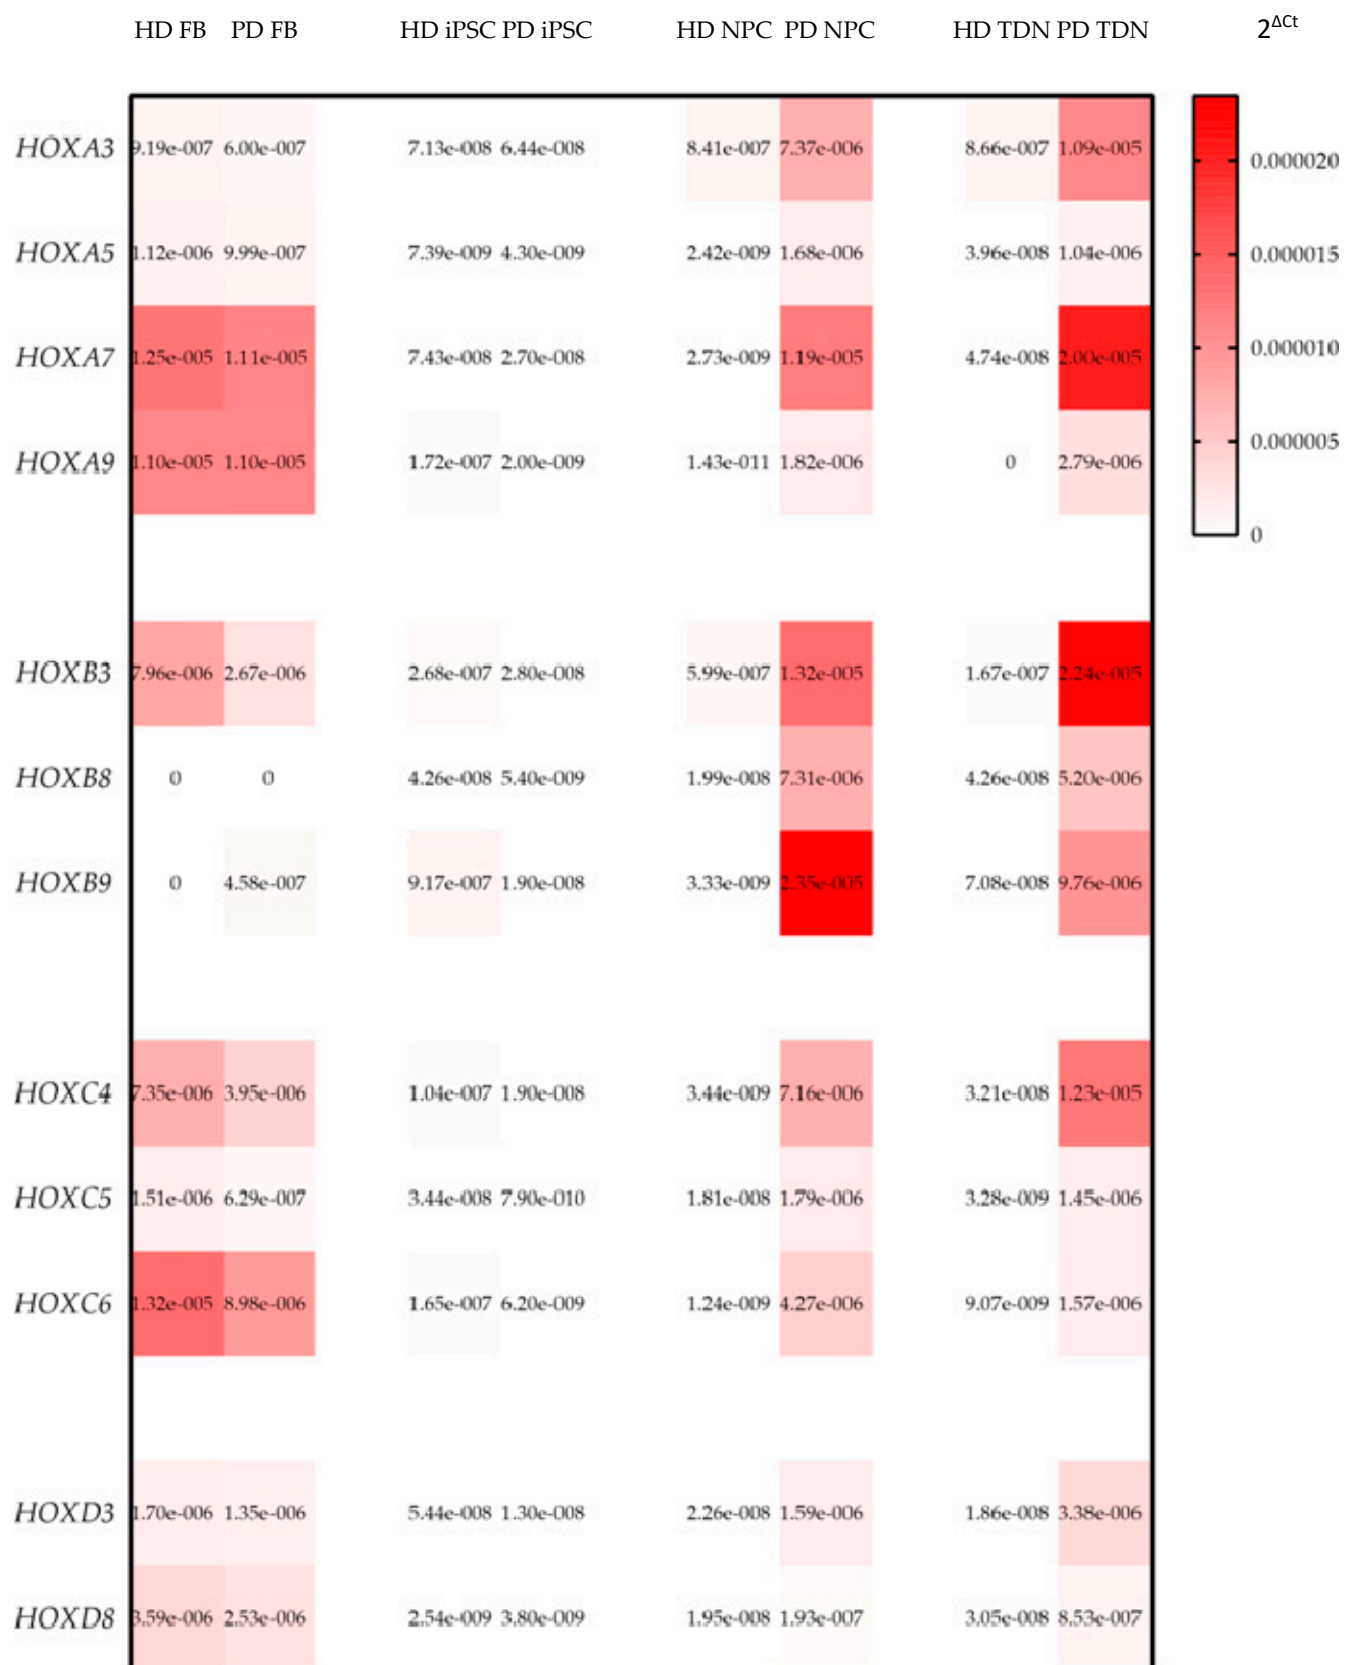

**Figure S6.** Heatmap of the *HOX* gene expression in fibroblasts (FB), iPSC, NPC, and TDN cell lines from PD (mean of PD2, PD3, PD4, PD5, and PD6) and HD (mean of HD1, HD2, HD3) obtained using qPCR. The data were normalized

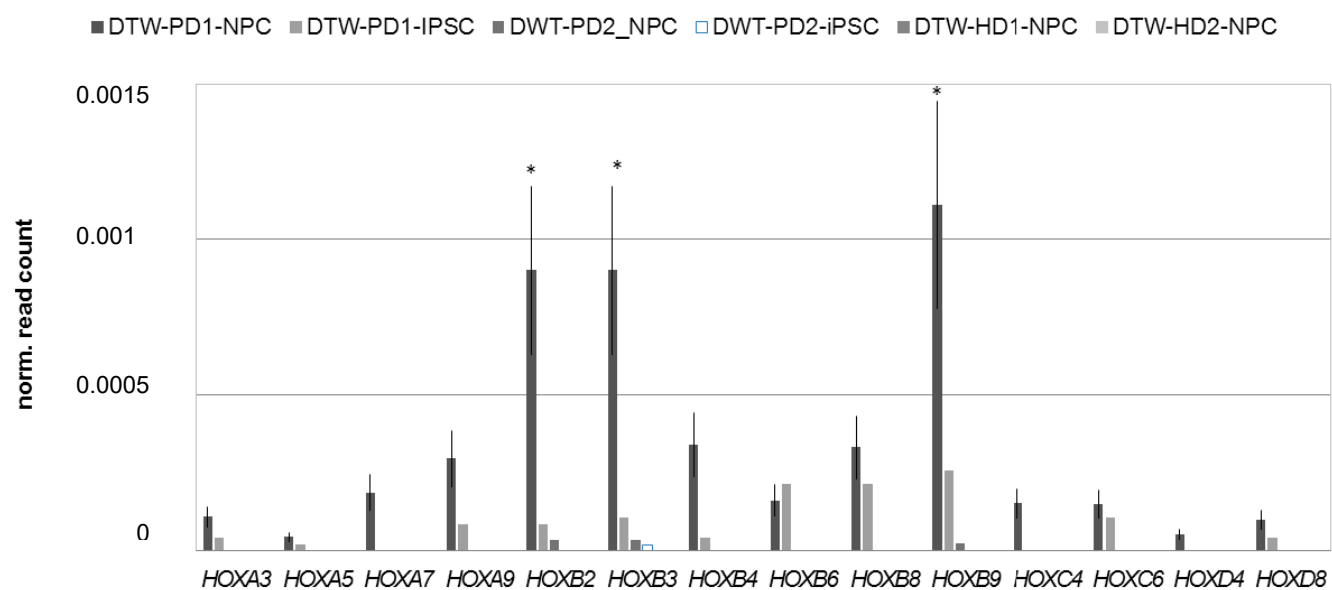

**Figure S7.** NRC calculated in cells from discordant twins (DTW) (GSE185009). The transcription of HOX genes is up-regulated in NPC from patient with PD (DTW-PD1-NPC) comparing with that in DTW-PD1-iPSC, DTW-PD2-NPC, DTW-PD2-iPSC, DTW-HD1-NPC, DTW-HD2-NPC. Manna-Whitney U-test was used. \*P<0.05.

361 tcttagagtt **ccctc**ccacc cccaaaagac ttcactgggc acaggagaga cccctgaggg  
481 caccgtggga aggacagaca gaaagataga caggtagag tcgtc**ccctc** cccctgcccc  
781 tccccgcc**cc** **ctc**ctgggt **ccctc**tact ttccccctt ctctctctg at**ccctc**ttt  
1921 agccccggcc accacggccg ccgcccgcg **ccctc**ctt **ccctccctccct** ccttctcg **cc**  
1981 **ctccctc**tct **ctccctc**ct cgcgcgtgc cgctcgcggg **gccctc**ccgc gggcaacctg

**Figure S8.** Fragments of the HOXC-AS2 sequence with underlined bold letters corresponding to CTCF sensitive elements. Start point location is chromosome 12: 53993810 - 53996785 in reverse orientation GRCh38.
